# Supplementary material for: High intrinsic thermally conductivity side-chain liquid crystalline polysiloxane films grafted with pendent difunctional mesogenic groups
Source: Royal Society of Chemistry journal article supplement (doi:10.1039/d2py00432a), 2022-01-01
Supplement: d2py00432a5.pdf [file d2py00432a5.pdf]

## Supporting Information

### **High intrinsic thermally conductive side-chain liquid crystalline polysiloxane films graft with pendent difunctional mesogenic group**

Xiaole Zheng <sup>a, b, f</sup>, Yingjie Zhan <sup>a, c, f</sup>, Yingchun Liu <sup>a, c, f</sup>, Maoping Lu <sup>a, b, f</sup>, Enxiang Jiao <sup>a, e, f</sup>,

Hangzhen Zhang <sup>a, d, f</sup>, Jun Shi <sup>a, d, e</sup>, Mangeng Lu <sup>a, c, e</sup>, Kun Wu <sup>a, f, \*</sup>

<sup>a</sup> *Guangzhou Institute of Chemistry, Chinese Academy of Sciences, Guangzhou 510650, People's Republic of China.*

<sup>b</sup> *Guangdong Provincial Key Laboratory of Organic Polymer Materials for Electronics, Guangzhou 510650, People's Republic of China.*

<sup>c</sup> *CAS Engineering Laboratory for Special Fine Chemicals, Guangzhou 510650, People's Republic of China.*

<sup>d</sup> *CASH GCC Shaoguan Research Institute of Advanced Materials Co., Ltd, Shaoguan 512400, People's Republic of China.*

<sup>e</sup> *New Materials Research Institute of CASCHEM (Chongqing) Co., Ltd, Chongqing, 400714, PR China.*

<sup>f</sup> *University of Chinese Academy of Sciences, Beijing 100049, People's Republic of China.*

---

\*Corresponding author. E-mail address: [wukun@gic.ac.cn](mailto:wukun@gic.ac.cn) (K. Wu)

## Contens

**Fig. S1.**  $^1\text{H-NMR}$  spectra of (a) mesogenic monomer M and (b) S-CL.

**Fig. S2.** POM images ( $\times 20$ ) of SCLCP2 (a) 45 °C, (a') 114 °C, (a'') 123 °C, and (a''') 162°C and SCLCP5 (b) 73 °C, (b') 108 °C, (b'') 133 °C, and (b''') 201 °C upon heating.

**Fig. S3.** 1D WAXD peaks of (a) SCLCP2, (b) SCLCP3, (c) SCLCP4 and (d) SCLCP5 during heating from 30 °C to 160 °C.

**Fig. S4.** Fig. S4. (a) Schematic of transmission geometry used in WAXD and the vertical direction of shearing; (b) 2D WAXD pattern taken with the X-ray beam perpendicular to the film plane of SCLCP3 and (c) the scanning data are shown for the  $2\theta$  angle diffraction of SCLCP3.

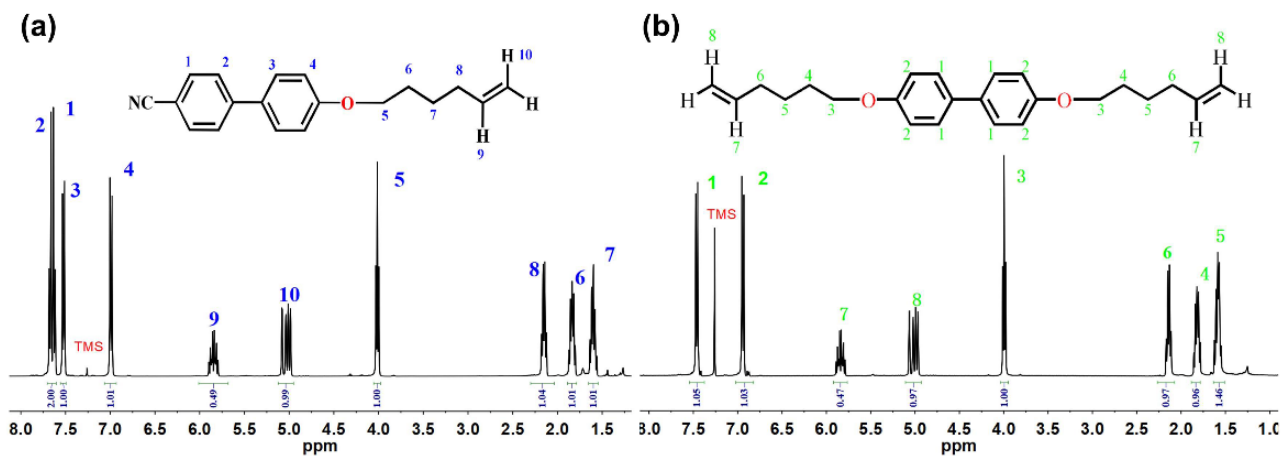

**Fig. S1.**  $^1\text{H-NMR}$  spectra of (a) mesogenic monomer M and (b) S-CL.

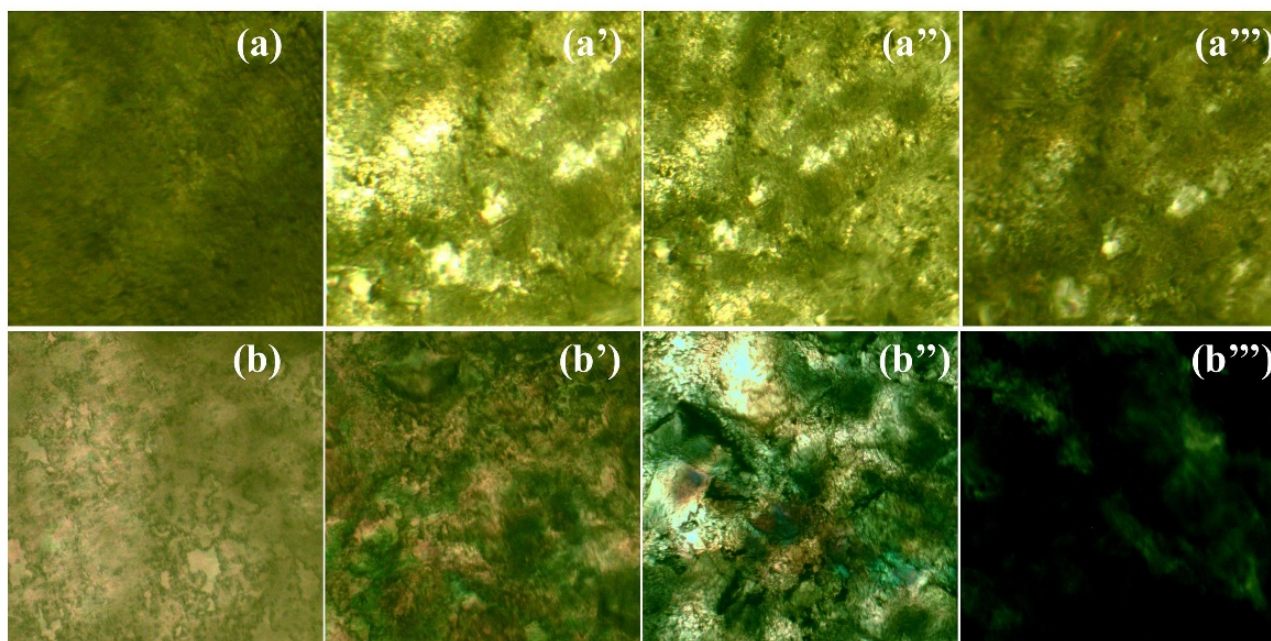

**Fig. S2.** POM images ( $\times 20$ ) of SCLCP2 (a) 45 °C, (a') 114 °C, (a'') 123 °C, and (a''') 162 °C and SCLCP5 (b) 73 °C, (b') 108 °C, (b'') 133 °C, and (b''') 201 °C upon heating.

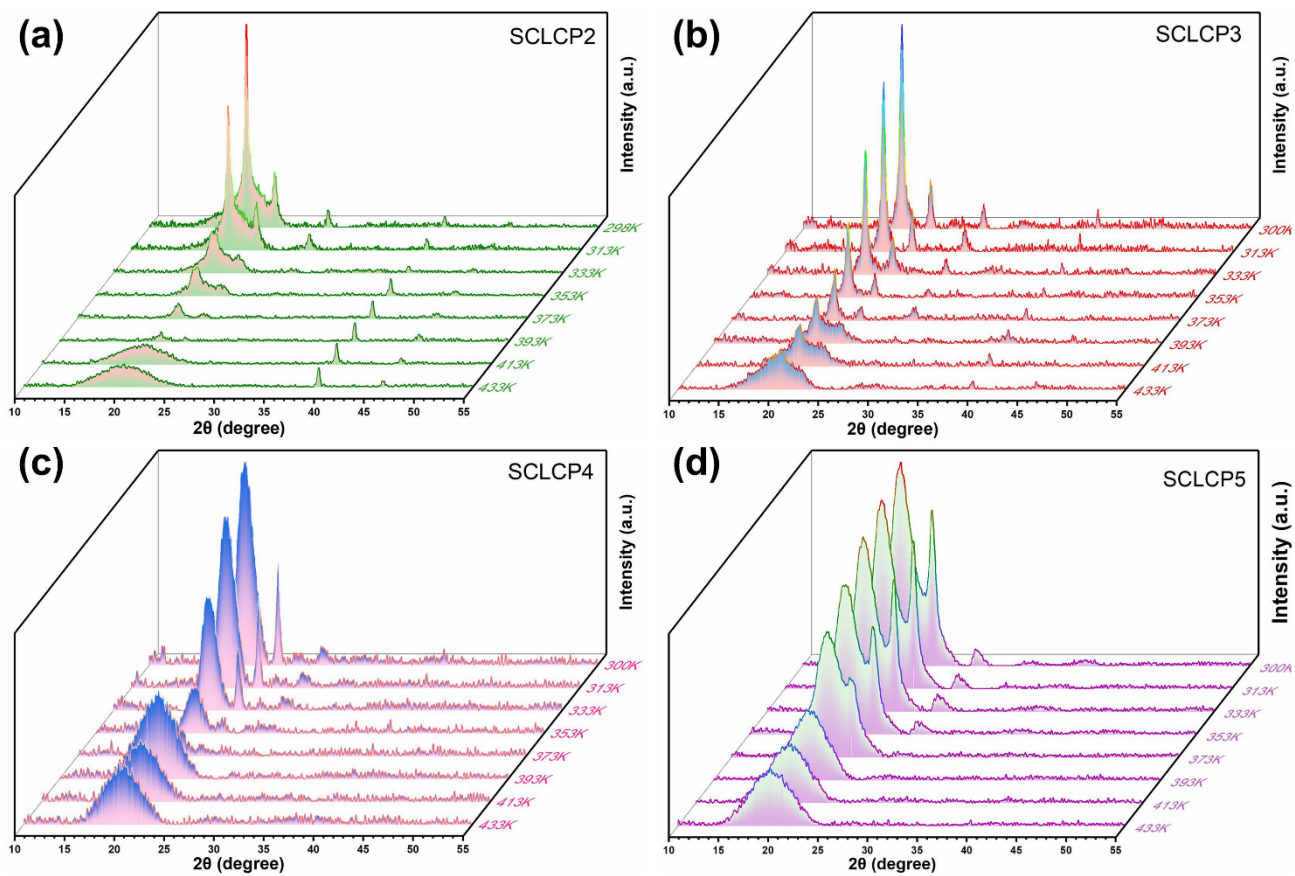

**Fig. S3.** 1D WAXD peaks of (a) SCLCP2, (b) SCLCP3, (c) SCLCP4 and (d) SCLCP5 during heating from 30 °C to 160 °C.

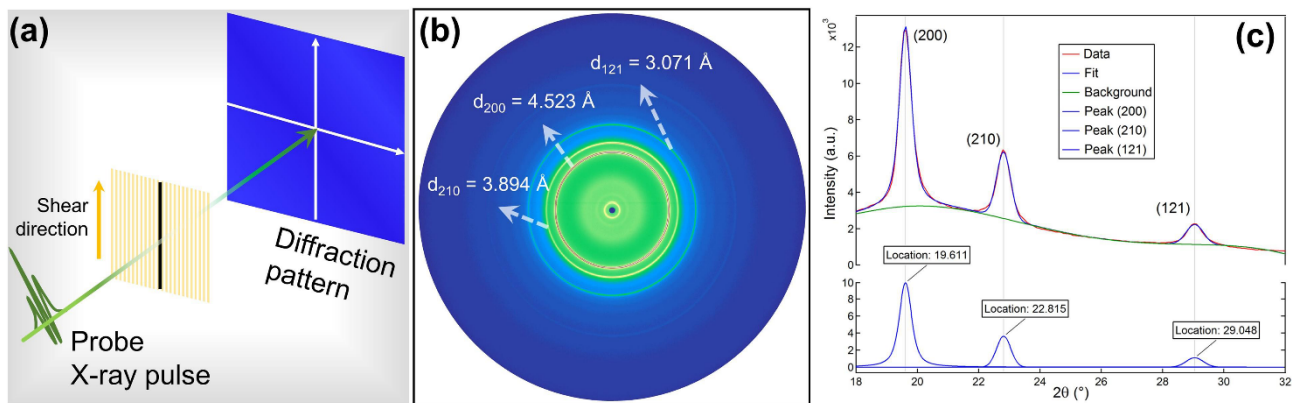

**Fig. S4.** (a) Schematic of transmission geometry used in WAXD and the vertical direction of shearing; (b) 2D WAXD pattern taken with the X-ray beam perpendicular to the film plane of SCLCP3 and (c) the scanning data are shown for the  $2\theta$  angle diffraction of SCLCP3.
